# Supplementary material for: A new fluorescent probe for ultrasensitive detection of phosgene in solution and the gas phase
Source: Royal Society of Chemistry journal article supplement (doi:10.1039/d1nj00037c), 2021-01-01
Supplement: d1nj00037c1.pdf [file d1nj00037c1.pdf]

## Supporting Information

### A New Fluorescent Probe for Ultrasensitive Detection of Phosgene in Solution and Gas Phase

Fenfen Zeng, Guangbo Bao, Baocheng Zhou, and Yifeng Han\*

*Department of Chemistry, Zhejiang Sci-Tech University, Hangzhou, 310018, China.*

*E-mail: [zstuchem@gmail.com](mailto:zstuchem@gmail.com) (Yifeng Han); Tel: +86-751-86843550;*

## Contents

|                                               |     |
|-----------------------------------------------|-----|
| Photophysical properties of <b>APQ</b> .....  | S3  |
| Additional spectroscopic data.....            | S4  |
| The characterization data of <b>APQ</b> ..... | S18 |
| References.....                               | S22 |

## Photophysical properties of APQ

**Table S1** Photophysical properties of the probe.

| entry               | $\lambda_{\text{ab}}$ (nm) | $\lambda_{\text{em}}$ (nm) | $\Phi^{\text{a}}$  |
|---------------------|----------------------------|----------------------------|--------------------|
| <b>APQ</b>          | 361                        | 447                        | 0.009              |
| <b>APQ+phosgene</b> | 357                        | 461                        | 0.192 <sup>b</sup> |

(a) The quantum yield ( $\Phi$ ) of **APQ** and **APQ**-phosgene system were determined according to the literature.<sup>1</sup> (b)  $\Phi$  was determined in the present of 1.0 equiv. of triphosgene and 2.0 equiv. of TEA.

$$\Phi_{\text{Sample}} = \frac{\Phi_{\text{QS}} \cdot A_{\text{QS}} \cdot F_{\text{Sample}} \cdot \lambda_{\text{exQS}} \cdot \eta_{\text{Sample}}^2}{A_{\text{Sample}} \cdot F_{\text{QS}} \cdot \lambda_{\text{exSample}} \cdot \eta_{\text{QS}}^2}$$

Where  $\Phi$  is quantum yield; A is absorbance at the excitation wavelength; F is integrated area under the corrected emission spectra;  $\lambda_{\text{ex}}$  is the excitation wavelength;  $\eta$  is the refractive index of the solution; the Sample and QS refer to the sample and the standard, respectively. We chose quinine sulfate in 0.1N H<sub>2</sub>SO<sub>4</sub> as standard, which has the quantum yield of 0.546.<sup>2</sup>

## Additional spectroscopic data

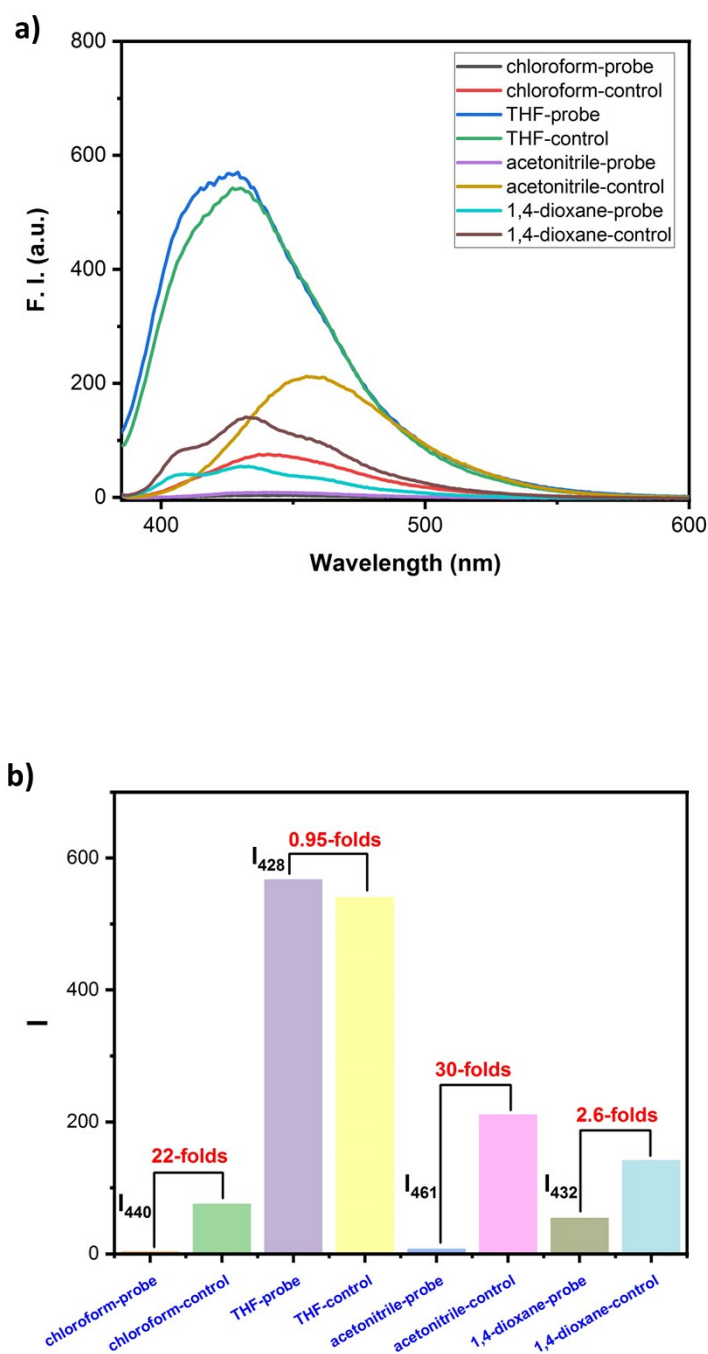

**Fig. S1** a) Fluorescence spectra of **APQ** (10.0  $\mu\text{M}$ ) in the presence of 1.0 equiv. of triphosgene in chloroform, THF, acetonitrile, and dioxane solution, respectively (containing 1% TEA,  $\lambda_{\text{ex}} = 377$  nm). b) Fluorescence intensity of a different solution of **APQ** (10.0  $\mu\text{M}$ ) before and after addition of 1.0 equiv. of triphosgene (containing 1% TEA).

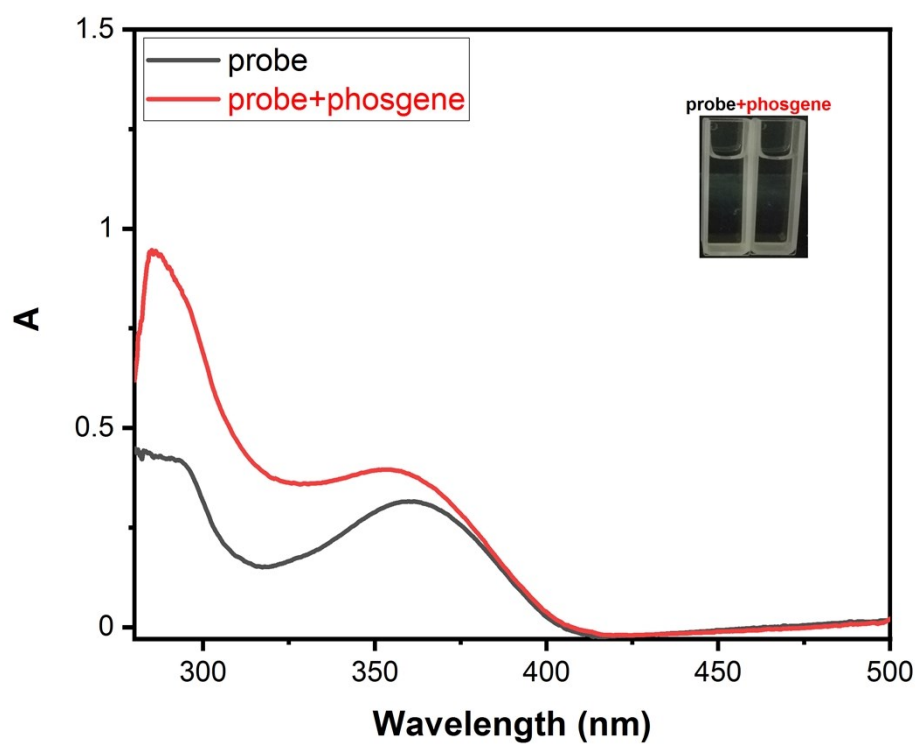

**Fig. S2** The UV-vis absorption of APQ (20.0  $\mu\text{M}$ ) and APQ (20.0  $\mu\text{M}$ ) in the present of 1.0 equiv. of triphosgene in  $\text{CH}_3\text{CN}$  solution (containing 1% TEA).

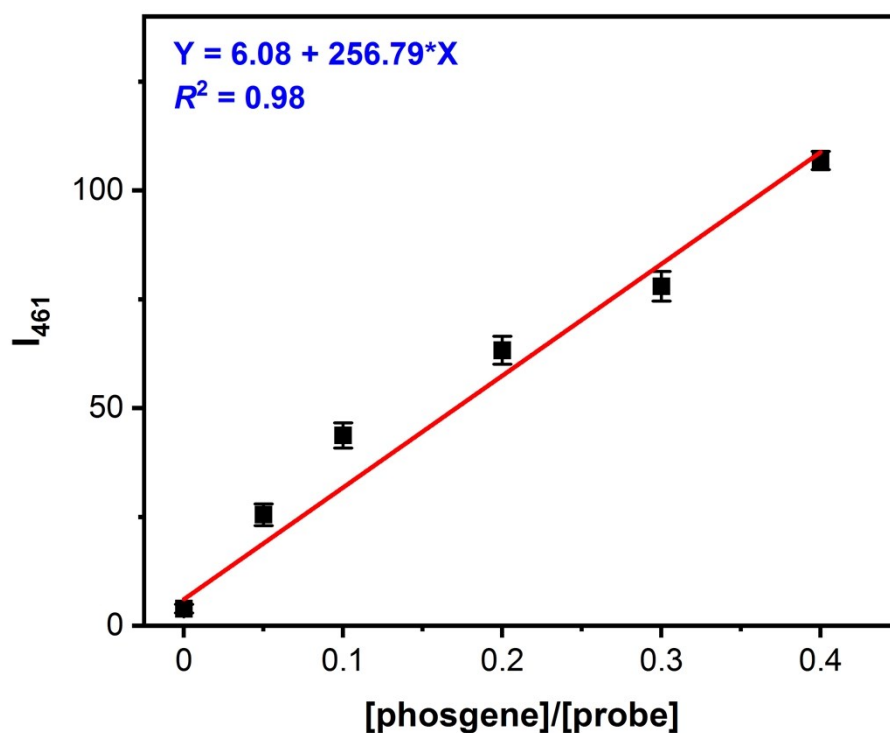

**Fig. S3** The changes of the fluorescent intensity of **APQ** (10.0  $\mu\text{M}$ ) at 461 nm ( $I_{461}$ ) as a function of phosgene concentration (0-4.0  $\mu\text{M}$ ) under the same condition as the phosgene titration.

The detection limit (DL) of phosgene using **APQ** was determined from the following equation: <sup>3</sup>

$$\text{DL} = 3 \cdot \sigma / K$$

Where  $\sigma$  is the standard deviation of the blank solution; K is the slope of the calibration curve.

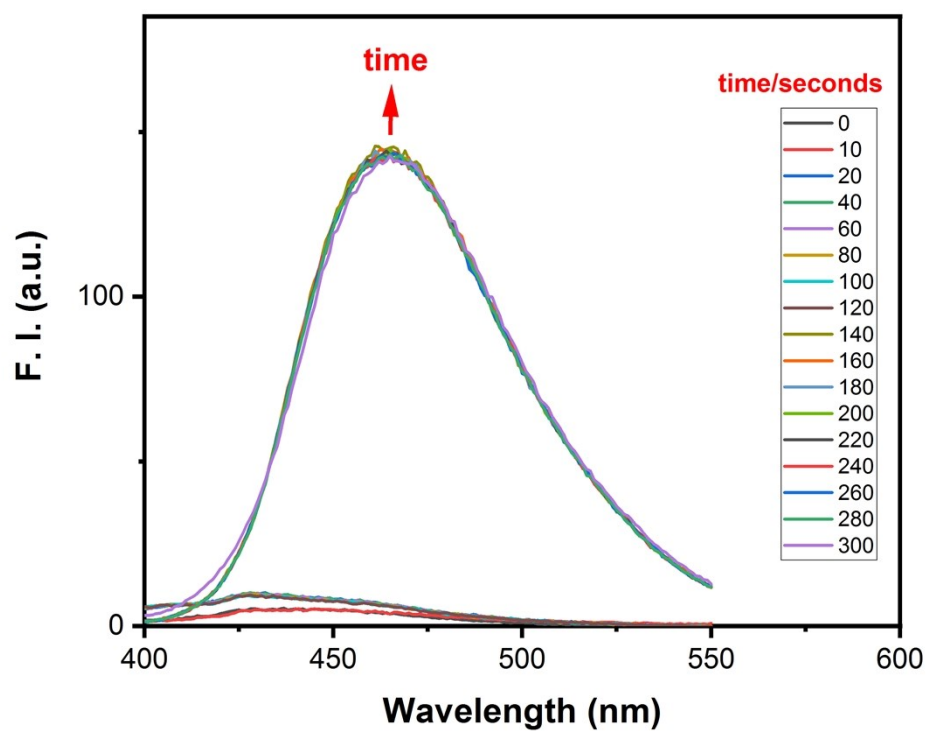

**Fig. S4** The fluorescent spectra of APQ (10.0  $\mu$ M) in the present of triphosgene (10.0  $\mu$ M) in the different reaction time (0-300 s) under the same condition as the phosgene titration.

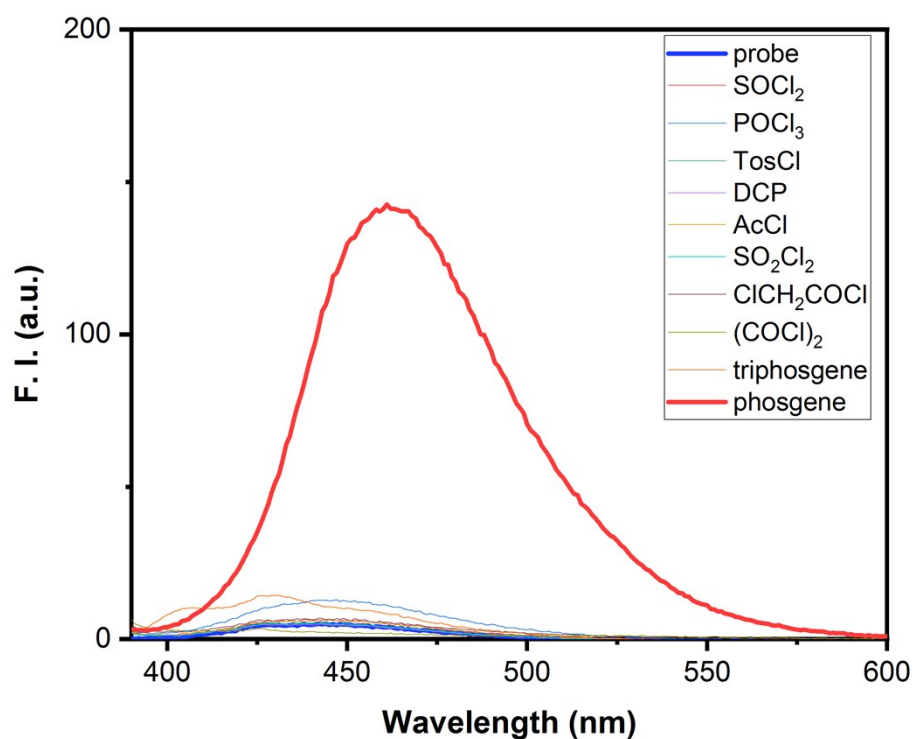

**Fig. S5** Fluorescence spectra of a CH<sub>3</sub>CN solution of probe **APQ** (10.0  $\mu$ M) before and after addition of various analytes (including SOCl<sub>2</sub>, POCl<sub>3</sub>, TosCl, DCP, AcCl, SO<sub>2</sub>Cl<sub>2</sub>, ClCH<sub>2</sub>COCl, (COCl)<sub>2</sub>, triphosgene, and phosgene ( $\lambda_{\text{ex}}$  = 377 nm).

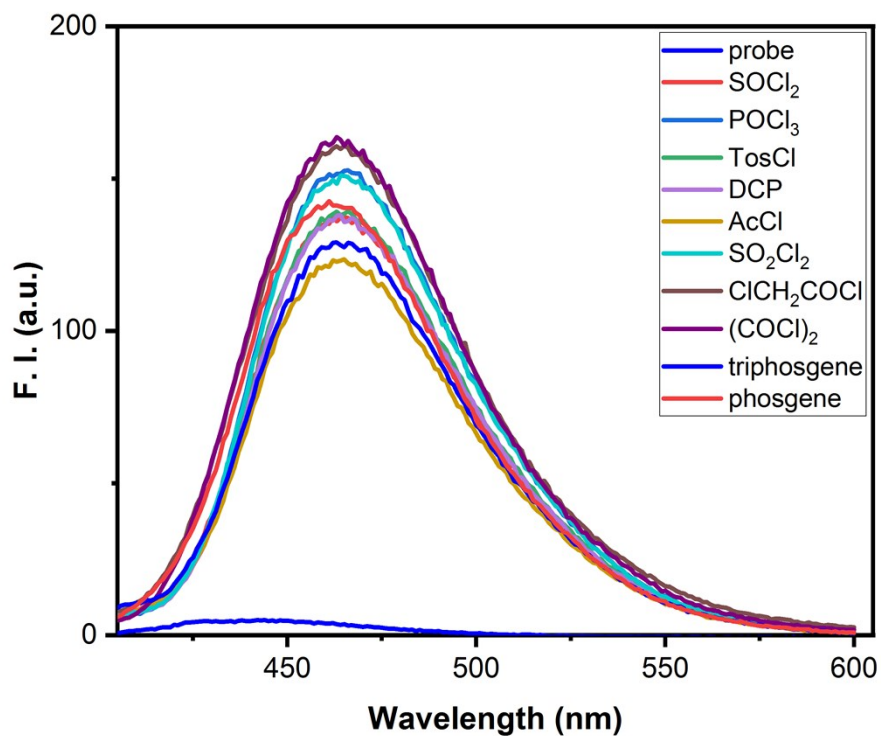

**Fig. S6** Fluorescence spectra of a CH<sub>3</sub>CN solution of probe **APQ** (10.0  $\mu$ M) in the presence of 1.0 equiv. of various analytes (including SOCl<sub>2</sub>, POCl<sub>3</sub>, TosCl, DCP, AcCl, SO<sub>2</sub>Cl<sub>2</sub>, ClCH<sub>2</sub>COCl, (COCl)<sub>2</sub>, triphosgene, and phosgene, followed by 1.0 equiv. of triphosgene (containing 1% TEA,  $\lambda_{\text{ex}} = 377$  nm).

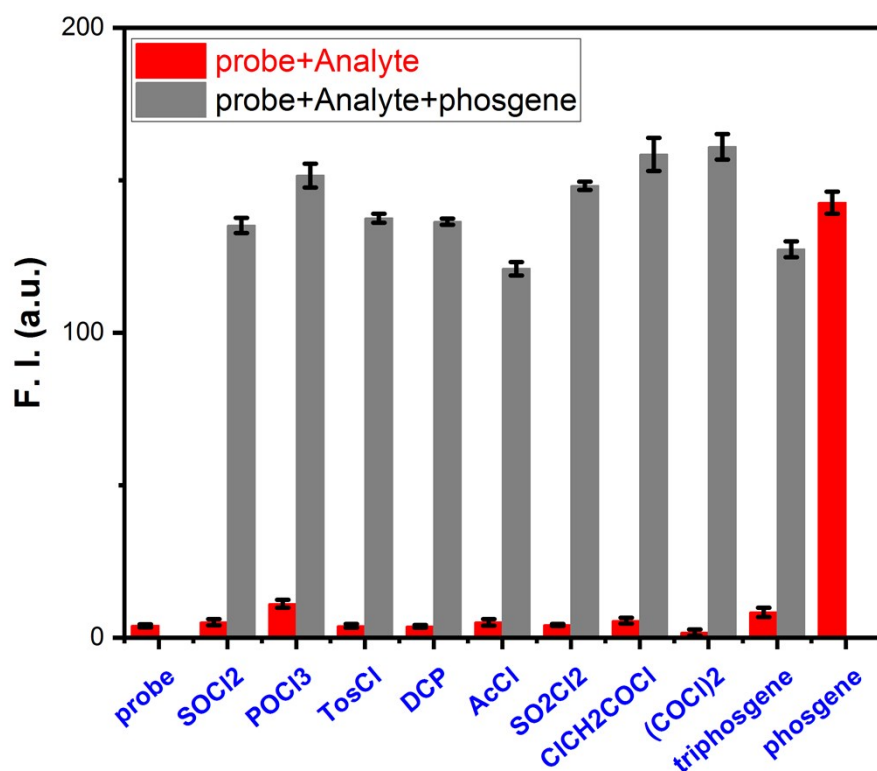

**Fig. S7** Fluorescence intensity in 461 nm ( $I_{461}$ ) of a CH<sub>3</sub>CN solution of probe APQ (10.0  $\mu$ M) before and after addition of various analytes (including SOCl<sub>2</sub>, POCl<sub>3</sub>, TosCl, DCP, AcCl, SO<sub>2</sub>Cl<sub>2</sub>, ClCH<sub>2</sub>COCl, (COCl)<sub>2</sub>, triphosgene, and phosgene, followed by the addition of 1.0 equiv. of triphosgene (containing 1% TEA,  $\lambda_{\text{ex}}$  = 377 nm).

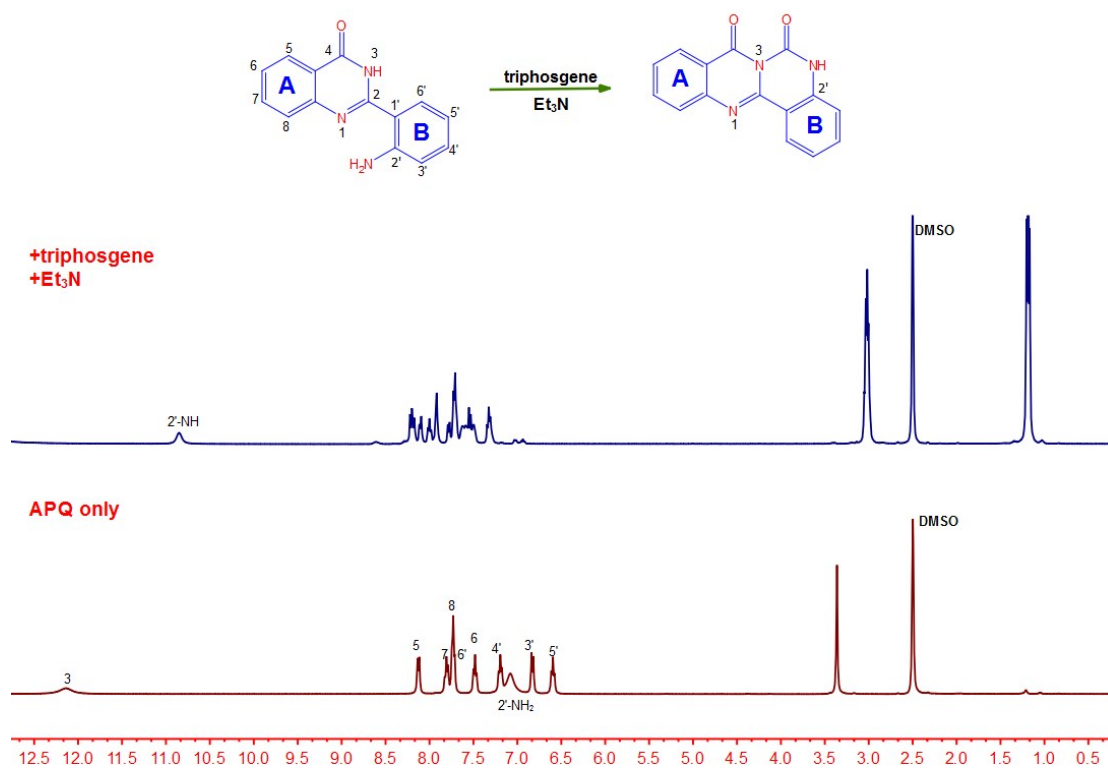

**Fig. S8**  $^1\text{H}$ NMR spectra of APQ and APQ in the presence of triphosgene in  $d_6$ -DMSO.

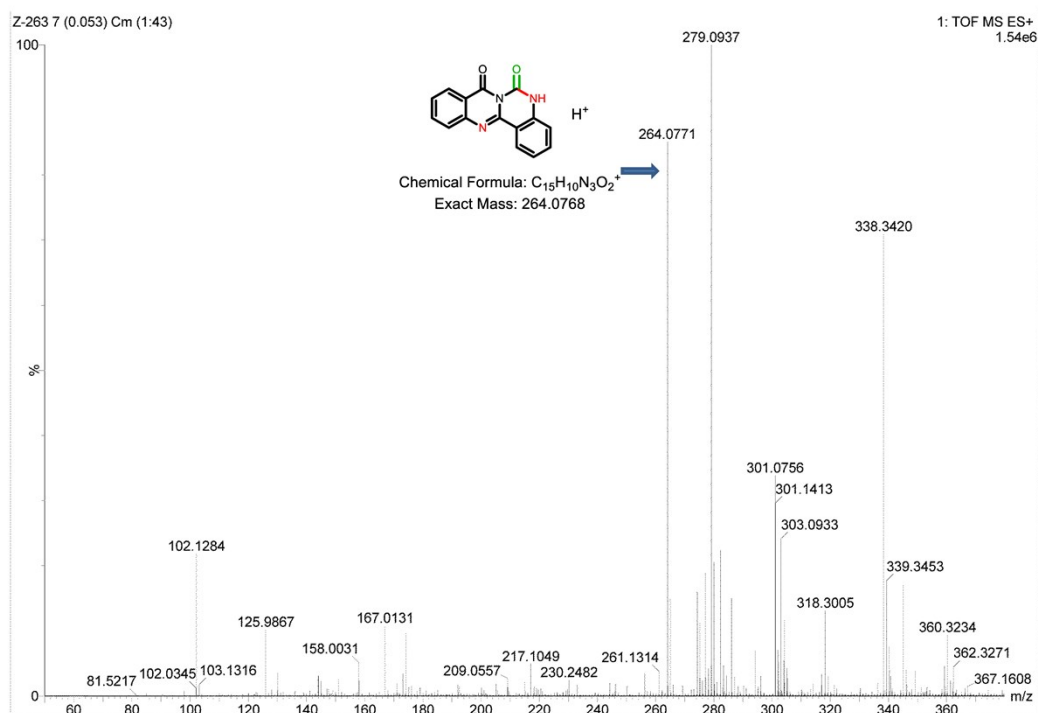

**Fig. S9** HR-MS (ESI) spectra of reaction mixture of **APQ** and phosgene.

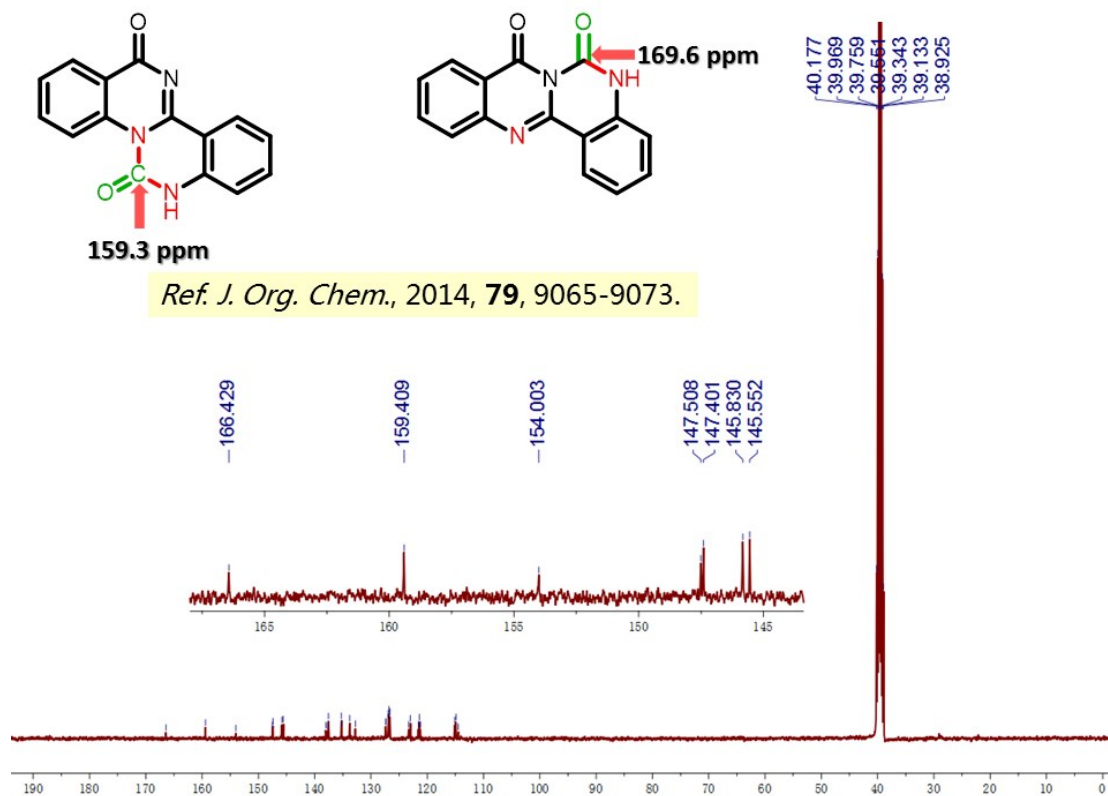

**Fig. S10** The <sup>13</sup>C NMR spectrum of the reaction product of APQ and phosgene.

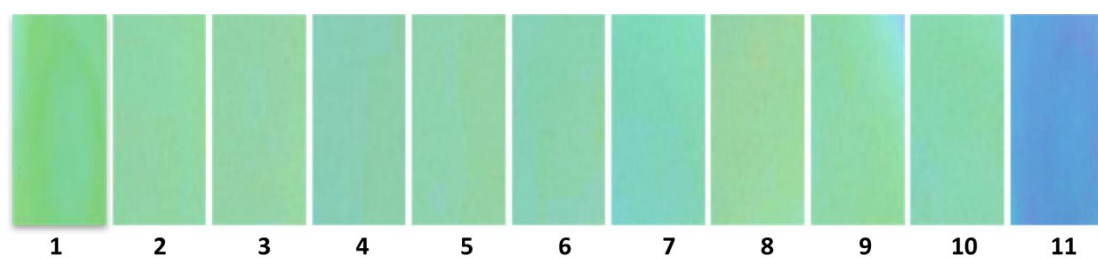

**Fig. S11** Photographs of the fluorescence of test strips containing absorbed probe **APQ** exposed for 1 min to vapors containing various analytes, (1) **APQ** only; (2)  $\text{SOCl}_2$ ; (3)  $\text{POCl}_3$ ; (4)  $\text{TosCl}$ ; (5)  $\text{DCP}$ ; (6)  $\text{AcCl}$ ; (7)  $\text{SO}_2\text{Cl}_2$ ; (8)  $\text{ClCH}_2\text{COCl}$ ; (9)  $(\text{COCl})_2$ ; (10) triphosgene, and (11) phosgene (under a 365 nm hand-held UV lamp).

**Table S2** Summary of some reported phosgene fluorescent probes.

| Entry | Structures                                                                          | Response mode | LOD (in solution) | Response time |         | References                                                     |
|-------|-------------------------------------------------------------------------------------|---------------|-------------------|---------------|---------|----------------------------------------------------------------|
|       |                                                                                     |               |                   | In solution   | Gaseous |                                                                |
| 1     | 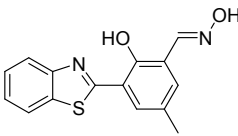   | off-on        | 0.48 nM           | 20 min        | 20 min  | <i>Dyes Pigments</i> , <b>2019</b> , 163, 483-488.             |
| 2     | 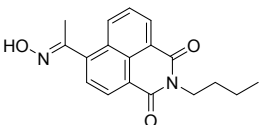   | off-on        | 6.3 nM            | 15 min        | 5 min   | <i>Dyes Pigments</i> , <b>2020</b> , 173, 10784.               |
| 3     | 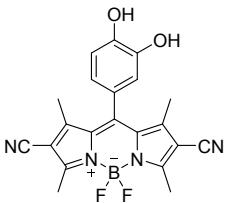  | off-on        | 124 pM            | < 3 s         | 30 s    | <i>Sens. Actuators. B. Chem.</i> , <b>2019</b> , 283, 458-462. |
| 4     | 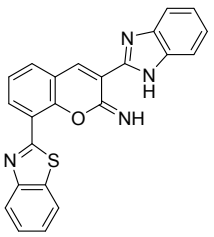 | off-on        | 1.65 nM           | 3 min         | -       | <i>Sens. Actuators. B. Chem.</i> , <b>2021</b> , 326, 128837.  |
| 5     | 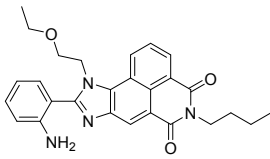 | ratio-metric  | 526 nM            | 2.5 s         | 10 s    | <i>Anal. Chem.</i> , <b>2019</b> , 91, 5690-5697.              |
| 6     | 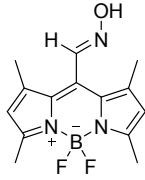 | off-on        | 0.09 ppb          | < 10 s        | 30 s    | <i>Anal. Chem.</i> , <b>2017</b> , 89, 12837-12842.            |
| 7     | 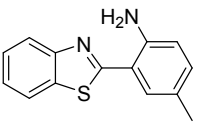 | ratio-metric  | 0.14 ppm          | 4 min         | 10 min  | <i>Anal. Chem.</i> , <b>2017</b> , 89, 12596-12601.            |

|    |                                                                                     |             |          |           |         |                                                                    |
|----|-------------------------------------------------------------------------------------|-------------|----------|-----------|---------|--------------------------------------------------------------------|
| 8  | 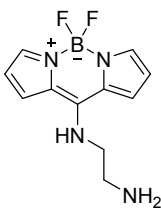   | ratiometric | 0.14 ppm | < 1.5 s   | < 1 min | <i>ACS Appl. Mater. Interfaces</i> , <b>2017</b> , 9, 13920-13927. |
| 9  | 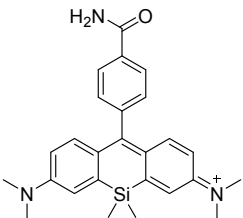   | off-on      | 8.9 nM   | < 4 min   | 5 min   | <i>J. Mater. Chem. C</i> , <b>2018</b> , 6, 10472-10479.           |
| 10 | 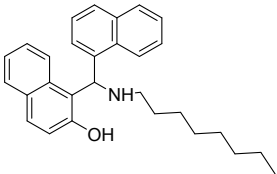   | off-on      | 0.4 μM   | < 1 min   | 20 s    | <i>New J. Chem.</i> , <b>2019</b> , 43, 11743-11748.               |
| 11 | 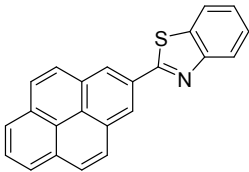  | off-on      | 1.54 nM  | < 1.3 min | 50 s    | <i>New J. Chem.</i> , <b>2019</b> , 43, 14991-14996.               |
| 12 | 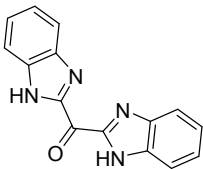 | off-on      | 3.3 nM   | < 30 s    | 10 min  | <i>Anal. Methods</i> , <b>2020</b> , 12, 3123-3129.                |
| 13 | 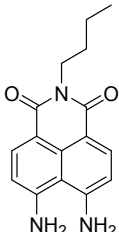 | ratiometric | 2.25 μM  | 10 min    | 20 min  | <i>J. Chin. Chem. Soc.</i> , <b>2020</b> , 67, 1213-1218.          |
| 14 | 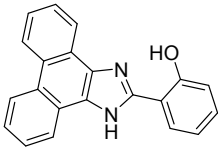 | ratiometric | 0.14 ppm | < 30 s    | < 2 min | <i>Talanta</i> , <b>2019</b> , 200, 78-83.                         |

|    |                                                                                   |        |            |        |         |                                                           |
|----|-----------------------------------------------------------------------------------|--------|------------|--------|---------|-----------------------------------------------------------|
| 15 | 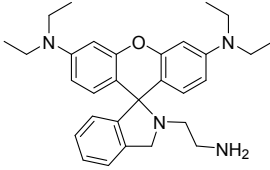 | off-on | 50 $\mu$ M | -      | -       | <i>Chem. Commun.</i> ,<br><b>2012</b> , 48,<br>1895-1897. |
| 16 | 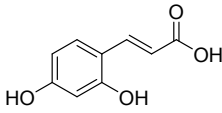 | off-on | 1-18 nM    | -      | -       | <i>Anal. Chem.</i> ,<br><b>2012</b> , 84,<br>4594-4597.   |
| 17 | 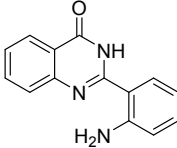 | off-on | 0.16 ppm   | < 20 s | ~ 1 min | This work                                                 |

## The characterization data of APQ

### $^1\text{H}$ NMR of 2-(2-nitrophenyl)quinazolin-4(3H)-one

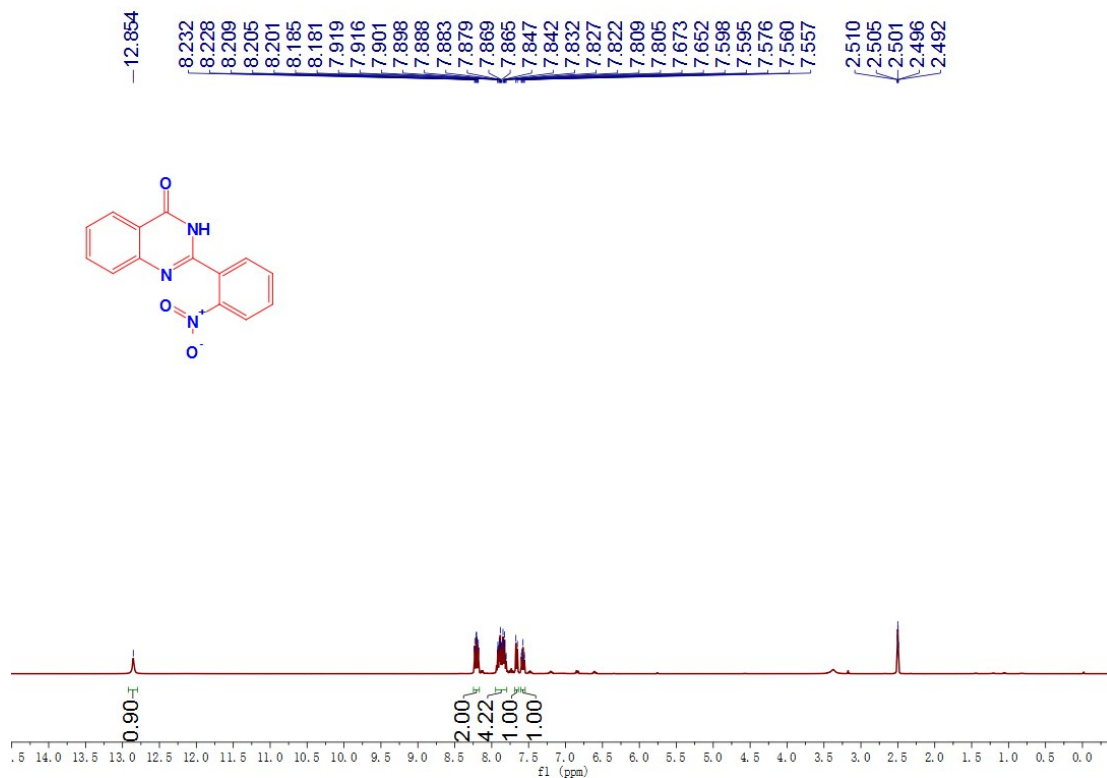

### $^{13}\text{C}$ NMR of 2-(2-nitrophenyl)quinazolin-4(3H)-one

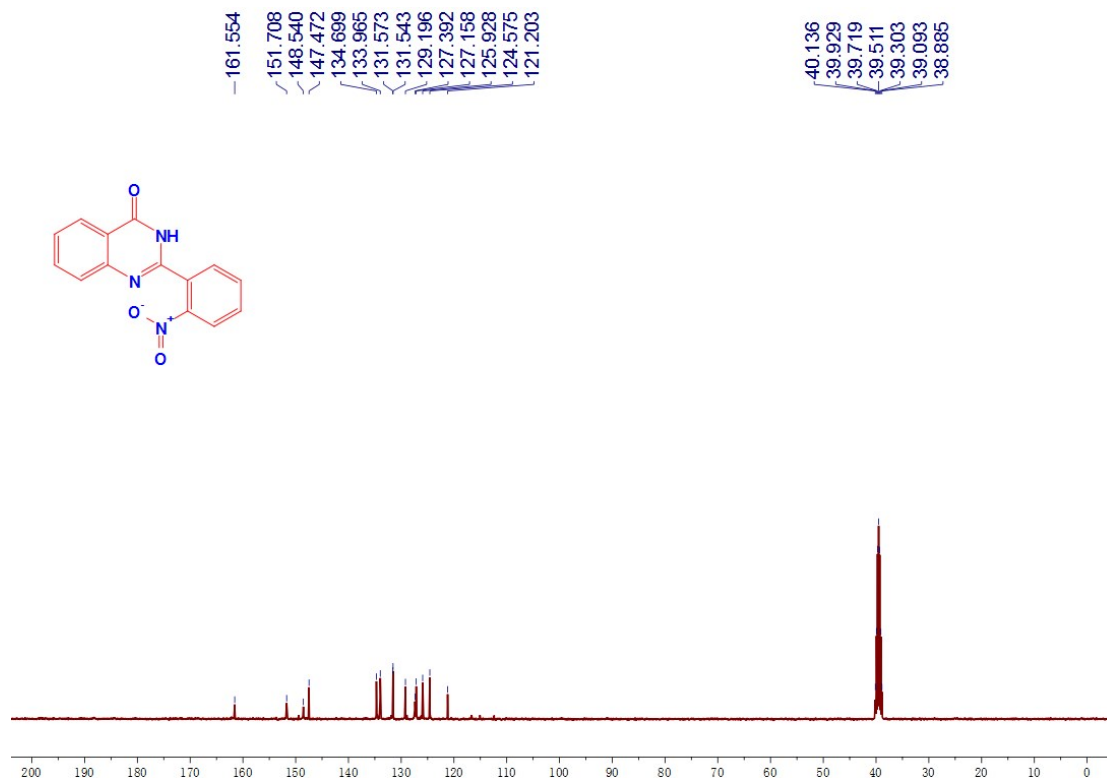

HR-MS of 2-(2-nitrophenyl)quinazolin-4(3H)-one

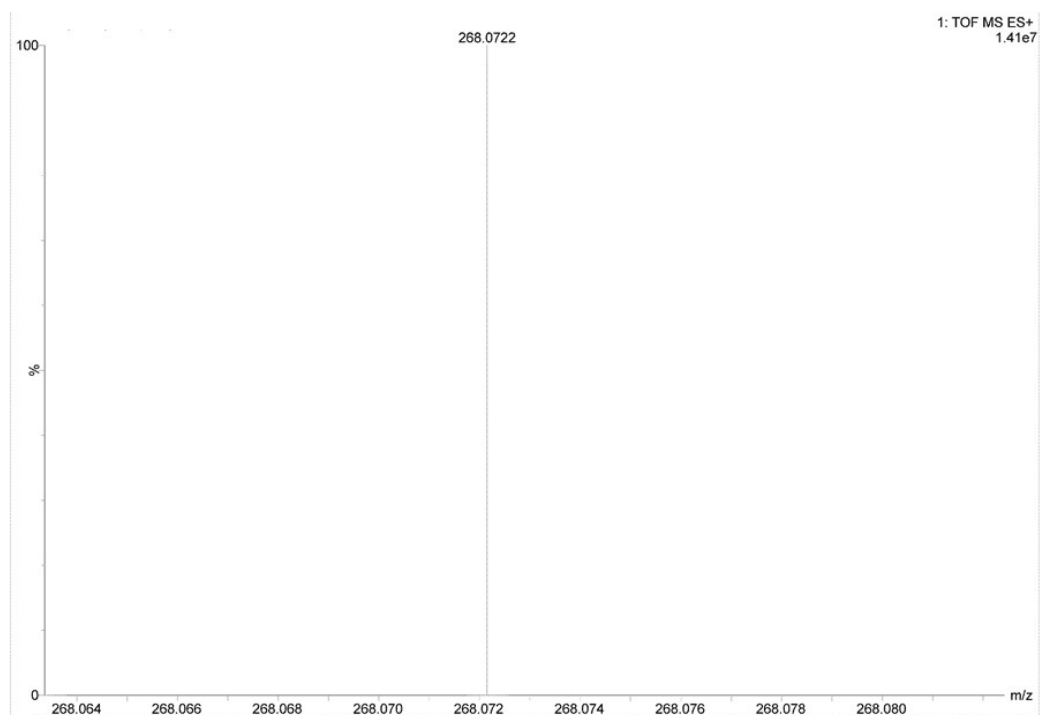

<sup>1</sup>H NMR of 2-(2-aminophenyl)quinazolin-4(3H)-one (APQ)

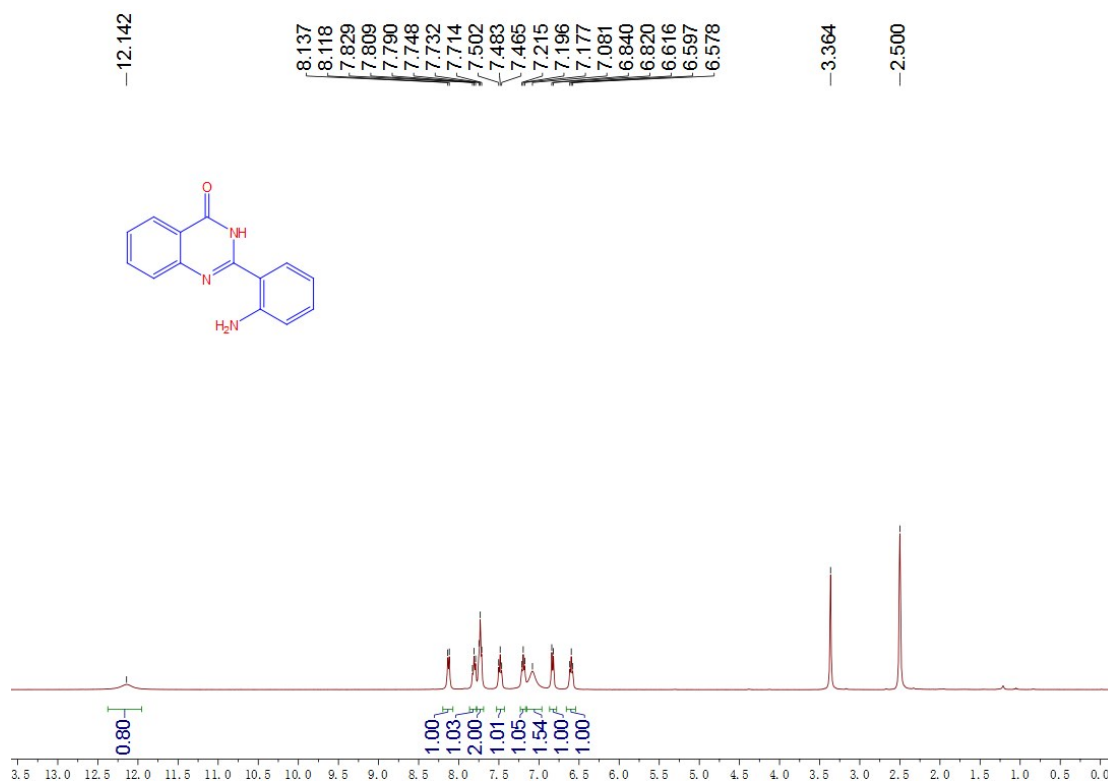

<sup>13</sup>C NMR of 2-(2-aminophenyl)quinazolin-4(3H)-one (APQ)

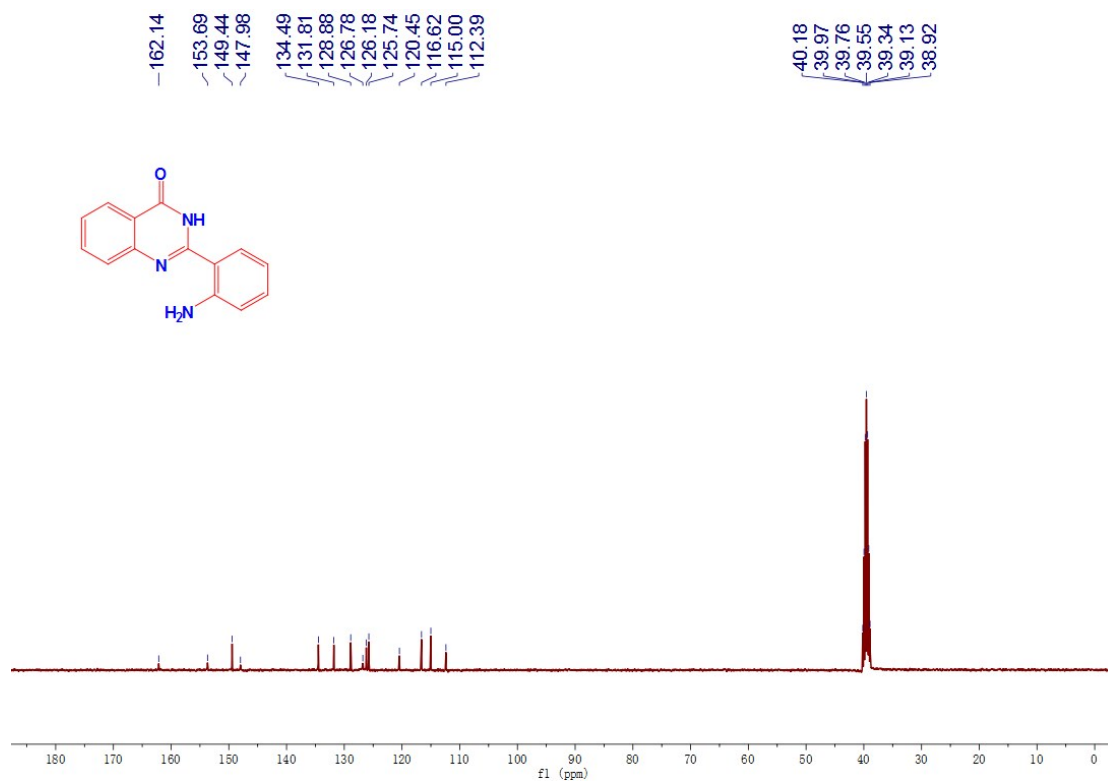

HR-MS of 2-(2-aminophenyl)quinazolin-4(3H)-one (APQ)

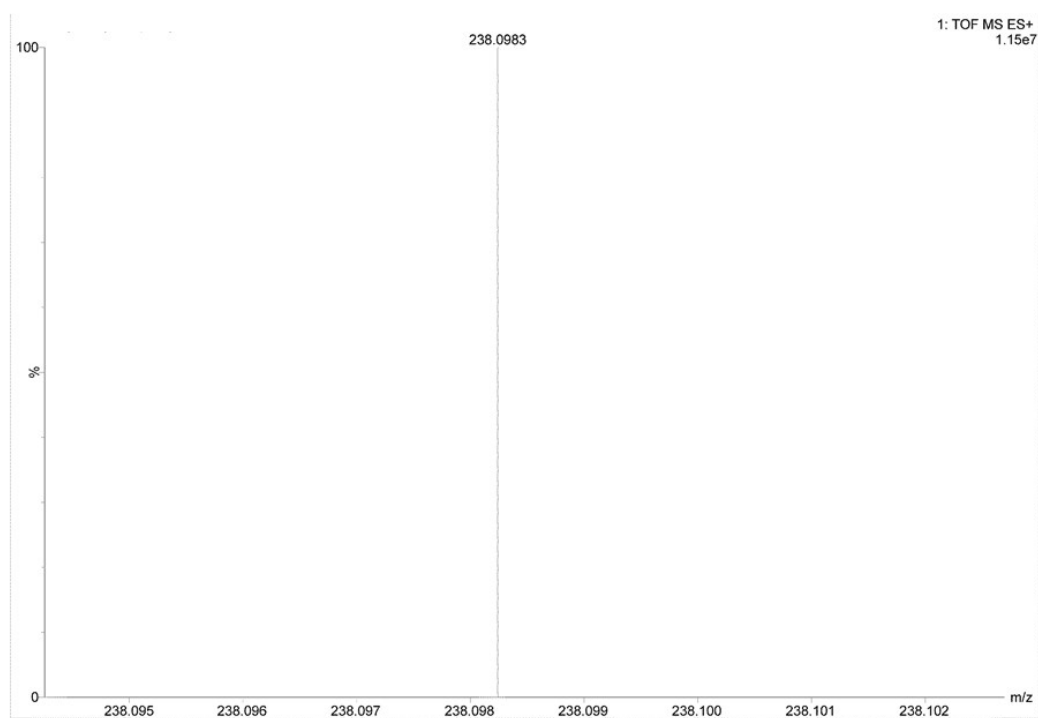

<sup>1</sup>H NMR of 5H-quinazolino[4,3-b]quinazoline-6,8-dione (APQU1)

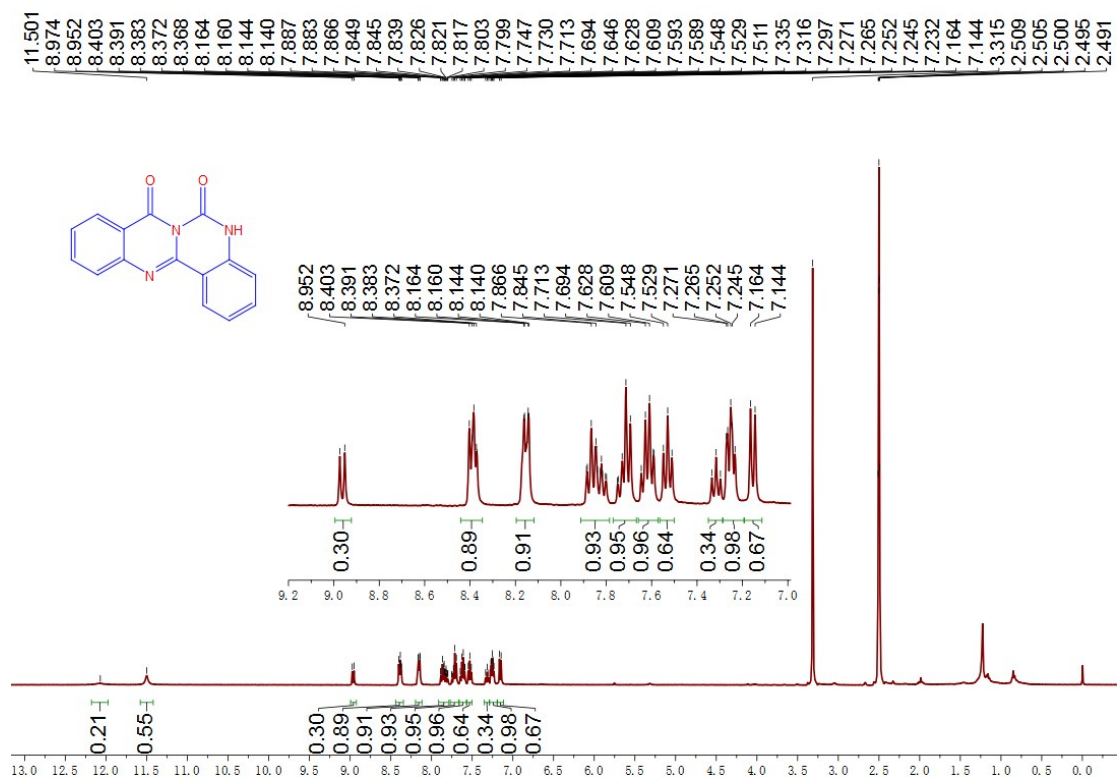

<sup>13</sup>C NMR of 5H-quinazolino[4,3-b]quinazoline-6,8-dione (APQU1)

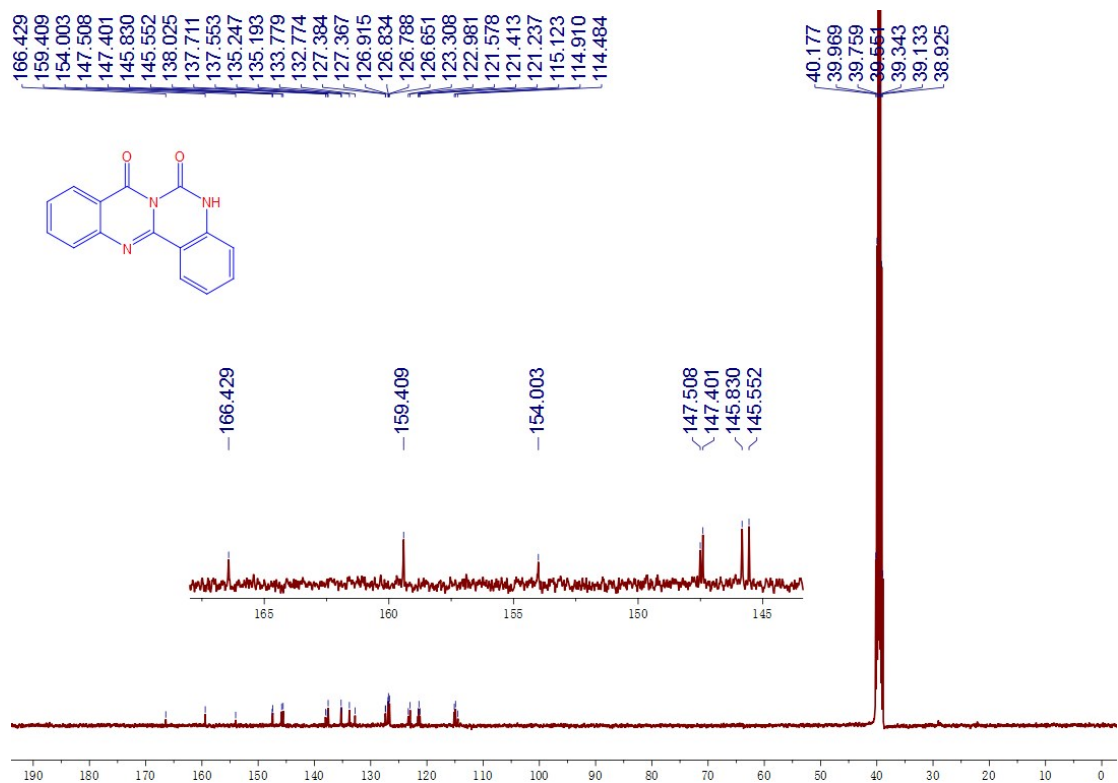

## HR-MS of 5H-quinazolino[4,3-b]quinazoline-6,8-dione (APQU1)

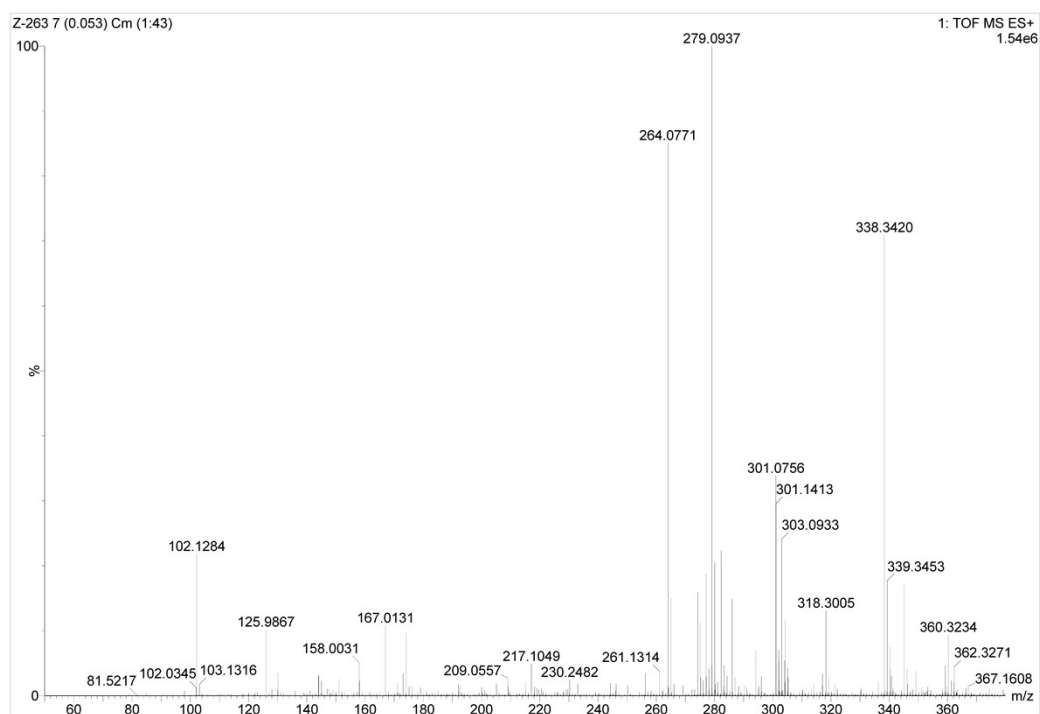

## References

- 1 R. A. Velapoldi, and H. H. Tønnesen, *J. Fluoresc.*, 2004, **14**, 465-472.
- 2 (a) D. F. Eaton, *Pure Appl. Chem.*, 1988, **60**, 1107-1114; (b) D. Magde, R. Wong, and P. G. Seybold, *Photochem. Photobiol.*, 2002, **75**, 327-334.
- 3 (a) J. T. Yeh, P. Venkatesan and S. P. Wu, *New J. Chem.*, 2014, **38**, 6198-6204. (b) A. Roy, D. Kand, T. Saha and P. Talukdar, *Chem. Commun.*, 2014, **50**, 5510-5513.
